# Instructions for Obtaining ANESTHESIOLOGY Continuing Medical Education (CME) Credit

CME Editors: Leslie C. Jameson, M.D., and Dan J. Kopacz, M.D.

ANESTHESIOLOGY's Journal CME is open to all readers. Members of the American Society of Anesthesiologists (ASA) enjoy a preferred rate for their subscription. However, Journal CME is not limited to ASA members or Journal subscribers. To take part in Journal CME, complete the following steps:

1. For the article listed on the right, read the learning objectives and disclosure information.
2. Read the article in the print or online edition.
3. Register at [www.asahq.org/journal-cme](http://www.asahq.org/journal-cme) and provide payment.
4. Once online, complete the questions and other required information for the CME program, including the evaluation.

The American Society of Anesthesiologists is accredited by the Accreditation Council for Continuing Medical Education to provide continuing medical education for physicians.

The American Society of Anesthesiologists designates this educational activity for a maximum of 1 *AMA PRA Category 1 Credit(s)*<sup>TM</sup>. Physicians should only claim credit commensurate with the extent of their participation in the activity.

**Purpose:** The focus of ANESTHESIOLOGY Journal CME is to educate readers on current developments in the science and clinical practice of anesthesiology.

**Target Audience:** ANESTHESIOLOGY Journal CME is designed for physicians involved with anesthesiology education, clinical practice, and research.

## Journal CME Planning Participants Disclosures

**Editor-in-Chief:** James C. Eisenach, M.D., has no relevant financial relationships to disclose.

**CME Editors:** Leslie C. Jameson, M.D., and Dan J. Kopacz, M.D., have no relevant financial relationships to disclose.

**ASA Staff:** Employees involved in planning have no relevant financial relationships to disclose.

## Claiming Credit

All tests and requests for credit must be submitted through the ANESTHESIOLOGY CME website at [www.asahq.org/journal-cme](http://www.asahq.org/journal-cme). Participants should claim credit in 15-minute increments, for a maximum of 1 *AMA PRA Category 1 Credit(s)*<sup>TM</sup> per journal article.

Two payment options are available:

|            | ASA Member | Non-member |
|------------|------------|------------|
| Annual Fee | \$60       | \$120      |
| Per Issue  | \$10       | \$20       |

Payment may be made using Visa or MasterCard.

Please direct any questions about Journal CME to:

Joyce Canselor

Education Coordinator, CME

(847) 268-9185

[j.canselor@asahq.org](mailto:j.canselor@asahq.org)

## This Month's ANESTHESIOLOGY Journal CME

Read the article by Wallace *et al.* entitled "Association of the pattern of use of perioperative  $\beta$ -blockade and postoperative mortality" on page 794 and the accompanying editorial by Foëx and Sear entitled "Challenges of  $\beta$ -blockade in surgical patients" on page 767 of this issue.

## Learning Objective(s)

After completing this activity, the learner should be able to apply the current American College of Cardiology Foundation and the American Heart Association recommendation for perioperative  $\beta$ -blocker administration to patient care, recognize the risks of discontinuing  $\beta$ -blocker therapy in the perioperative period, and balance the risk/benefit of adding  $\beta$ -blocker therapy to patients not receiving  $\beta$ -blockers prior to surgery.

## Author(s) Disclosures

**Authors:** Arthur W. Wallace, M.D., Ph.D., Selwyn Au, M.S., and Brian A. Cason, M.D., have no financial interest in or affiliation with any commercial supporter or providers of any commercial services discussed in this educational material.

**Authors:** Pierre Foëx, M.D., D.Phil., F.R.C.A., F.A.N.Z.C.A., F.C.A.(S.A.), F.Med.Sci., is a consultant for Baxter Healthcare Corporation and was a UK investigator in the POISE study (but not involved in the writing of the paper), which was funded in part by AstraZeneca. John W. Sear, B.Sc., Ph.D., M.B.B.S., F.F.A.R.C.S., F.A.N.Z.C.A., is a consultant for Baxter Healthcare Corporation and was a UK investigator in the POISE study (but not involved in the writing of the paper), which was funded in part by AstraZeneca.

## Expiration

Registration and submission of answers must be completed by October 31, 2013.
